# Supplementary material for: Murine Aβ over-production produces diffuse and compact Alzheimer-type amyloid deposits
Source: Springer Nature journal article supplement (doi:10.1186/s40478-015-0252-9), 2015-11-14

## Electronic Supplementary Material

Murine A $\beta$  over-production produces diffuse and compact Alzheimer-type amyloid deposits

Guilian Xu<sup>1,4</sup>, Yong Ran<sup>1,4</sup>, Susan E. Fromholt<sup>1,3,4</sup>, Chunhua Fu<sup>5</sup>, Anthony T. Yachnis<sup>6</sup>, Todd E. Golde<sup>1,2,4</sup>, David R. Borchelt<sup>1-4</sup>

<sup>1</sup>Center for Translational Research in Neurodegenerative Disease, <sup>2</sup>McKnight Brain Institute, <sup>3</sup>SantaFe HealthCare Alzheimer's Disease Research Center, <sup>4</sup>Department of Neuroscience, <sup>5</sup>Department of Medicine, <sup>6</sup>Department of Pathology, University of Florida College of Medicine, University of Florida, Gainesville, FL 32610.

Table S1. Laboratory names and line designations of the transgenic mice used.

| Mouse Designation    | PrP.HuA $\beta$ /PS1        | PrP.MoA $\beta$ /PS1        | PrP.HuA $\beta$ (GFP) | tet.HuA $\beta$ (107)      | tet.MoA $\beta$ (GFP) | tet.HuA $\beta$ (GFP) |
|----------------------|-----------------------------|-----------------------------|-----------------------|----------------------------|-----------------------|-----------------------|
| A $\beta$ sequence   | Human                       | Mouse                       | Human                 | Human                      | Mouse                 | Human                 |
| APP mutation         | Swe                         | Swe                         | Swe/Ind               | Swe/Ind                    | Swe/Ind               | Swe/Ind               |
| Human PS1dE9         | Yes                         | Yes                         | -                     | -                          | -                     | -                     |
| Vector               | MoPrP.Xho                   | MoPrP.Xho                   | MoPrP.Xho             | CamKII-tTA X Tet-PrP       | CamKII-TTA X Tet-PrP  | CamKII-TTA X Tet-PrP  |
| K14-GFP co-injection | -                           | -                           | Yes                   | -                          | Yes                   | Yes                   |
| Laboratory Line Name | MoHuAPPswe/PS1dE9 (Line 85) | MoAPPswe/PS1dE9 (Line D943) | MHSI-695 +GFP         | tet.Mo/Hu APPsi (Line 107) | tet.MoAPPsi +GFP      | Tet.Mo/HuAPPsi +GFP   |

### Fig. S1 Comparison of APP expression levels in different lines of APP transgenic mice.

The forebrains of mice from each of the lines noted on the figure were homogenized and analyzed by immunoblots with mAb 22C11 (1:1000). Examples from 2 brains of nontransgenic (NTg) mice are also shown. moAPPsi-GFP = the responder line of tet.MoA $\beta$ (GFP) mice made by co-injection with vectors for K14-GFP. tTA/moAPPsi-GFP = bigenic CamKII-tTA x tetPrP-mAPPsi (+GFP) mice. MHSI-695-GFP = mice generated by co-injection of PrP.Xho vectors encoding MoHuAPPswe/ind and K14-GFP. tTA/MoHuAPPsi (line 107) = bigenic CamKII-tTA x tetPrP-MoHuAPPsi [1]. moAPPswe/PS1dE9 (D-943) and MoHuAPPswe/PS1dE9 Line 85 are described in the text. Each lane contains 50  $\mu$ g total protein analyzed on a 4-20% SDS-PAGE gel; the ages of the mice at harvest were between 1.5 to 5.5 months old. The ages that amyloid plaques usually appear in the various strains of mice are shown in the figure. The oldest observation age is 24 months for all mice.

### Fig. S2 Comparison of amyloid plaque distribution in PrP.MoA $\beta$ /PS1 and PrP.HuA $\beta$ /PS1 mice.

Representative images of sagittal sections from at least 3 animals of each genotype stained by Campbell-Switzer silver stain. In these images, the background silver staining (see Figure S2) has been digitally removed to highlight the black amyloid deposits. The age of the mice that produced each image is noted on the figure.

**Fig. S3 Comparison of amyloid plaque distribution in PrP.MoA $\beta$ /PS1 and PrP.HuA $\beta$ /PS1 mice.**

Representative images of sagittal sections from at least 3 animals of each genotype were stained by Campbell-Switzer silver stain. Enlarged images to the right show microscopic detail for the area inside the box. Notice that the plaques in PrP.MoA $\beta$ /PS1 mice in hippocampus were primarily cored. The ages of the animals are shown.

**Fig. S4 Congophilic amyloid deposits in tet.HuA $\beta$ (107), PrP.HuA $\beta$ /PS1, and PrP.MoA $\beta$ /PS1 mice.**

Representative amyloid plaques and blood vessels stained by Congo red, displayed by bright field (1<sup>st</sup> column), under cross polarized light (2<sup>nd</sup> column) and auto-fluorescence (3<sup>rd</sup> and 4<sup>th</sup> columns). A-C) Cortical plaques in tet.HuA $\beta$ (107) mice (25 months old), D) amyloid deposited around cortical blood vessels of the same mouse. E-G) Cortical plaques and H) amyloid deposited in cortical blood vessels in PrP.HuA $\beta$ /PS1 mice (Line 85, 25 months old). I-K) Cerebellar plaques and L) cerebellar blood vessels in the same mouse. M-O) Cortical plaques and P) amyloid deposited in cortical blood vessels in PrP.MoA $\beta$ /PS1 mice (Line D-943, 25 months old). Q-S) Cerebellar plaques and T) cerebellar blood vessels in the same mouse.

**Fig. S5 The distribution of amyloid plaques in tet.MoA $\beta$ (GFP), tet.HuA $\beta$ (107), and tet.HuA $\beta$ (GFP) mice.**

Representative images of sagittal sections from at least 3 animals of each genotype stained by Campbell-Switzer silver stain. Enlarged images to the right show microscopic detail for the area inside the box. The morphology of the mouse A $\beta$  plaques was more diffuse than either of the tet.HuA $\beta$  mice. The ages of the animals are shown.

**Fig. S6 The distribution of amyloid plaques in 24 month old tet.MoA $\beta$ (GFP) mice.**

Representative images of sagittal sections from at least 3 animals of each genotype stained by Campbell-Switzer silver stain. Enlarged images to the right show microscopic detail for the area inside the box. Note that all of the deposited A $\beta$  appeared as diffuse amyloid and there was far fewer plaques in the hippocampus.

**Fig. S7 The distribution of amyloid plaques in PrP.HuA $\beta$ (GFP) mice.**

Representative images of sagittal sections from at least 3 animals of each genotype stained by Campbell-Switzer silver stain. Enlarged images to the right show microscopic detail for the area inside the box. The deposited A $\beta$  in the hippocampus appeared as both cored deposits and diffuse deposits.

**Fig. S8 Analysis of insoluble A $\beta$  in the brains of PrP.MoA $\beta$ /PS1 and PrP.HuA $\beta$ /PS1 mice**

A) Forebrains or cerebellum of mice at various ages were homogenized in RIPA buffer and fractionated by centrifugation to separate the insoluble A $\beta$ , which was then re-extracted in SDS and then formic acid (FA). The levels of A $\beta$  were measured by ELISA.

B) To demonstrate that the primary peptide detected in the insoluble fraction of the PrP.MoA $\beta$ /PS1 mice was A $\beta$ 42, we calculated the ratio of A $\beta$ 42 to 40 in the brains of each animal at each age analyzed. Data from the brains of PrP.HuA $\beta$ /PS1(Line 85) mice is shown for comparison. In the brains of the Line 85 mice, the ratio of A $\beta$ 42 to 40 in either the SDS soluble or formic acid soluble fractions ranged between 2:1 and 10:1. In the brains of the PrP.MoA $\beta$ /PS1 mice, the ratio of 42:40 ranged from 10:1 to 30:1. SDS F & SDS C = SDS soluble fractions from forebrain and cerebellum, respectively. FA F & FA C = Formic acid soluble fractions from forebrain and cerebellum, respectively.

**Fig. S9 Analysis of insoluble A $\beta$  in the brains of tet.MoA $\beta$ (GFP) mice**

Forebrains of mice were homogenized in RIPA buffer and then fractionated by centrifugation and sequential extraction in SDS and formic acid (FA) to separate the soluble and insoluble A $\beta$  peptides. As the mice aged and amyloid was deposited, there was a significant rise in the level of A $\beta$ 42 that was solubilized by SDS. Consequently, the ratio of A $\beta$ 42 to 40 in the SDS-soluble fraction rose to very high levels.

**Fig. S10 Neuritic morphology of amyloid plaques in the cerebellum of PrP.MoA $\beta$ /PS1 and PrP.HuA $\beta$ /PS1(Line 85) mice**

Representative images of neuritic profiles in cerebellar, hippocampal, and cortical amyloid plaques in tissue sections stained with antibodies to ubiquitin. The images shown are representative of images from an analysis of at least 3 animals at each age and each genotype with at least 6 individual tissue sections taken from similar levels for each animal. A-F). PrP.HuA $\beta$ /PS1(Lline 85); G-L). PrP.MoA $\beta$ /PS1 mice. All the images were digitally cropped from the pictures taken with 100x oil lens; further digital magnification was used to enlarge the image (all images digitally enlarged to the same degree).

Fig. S1. Expression of total APP in transgenic mice.

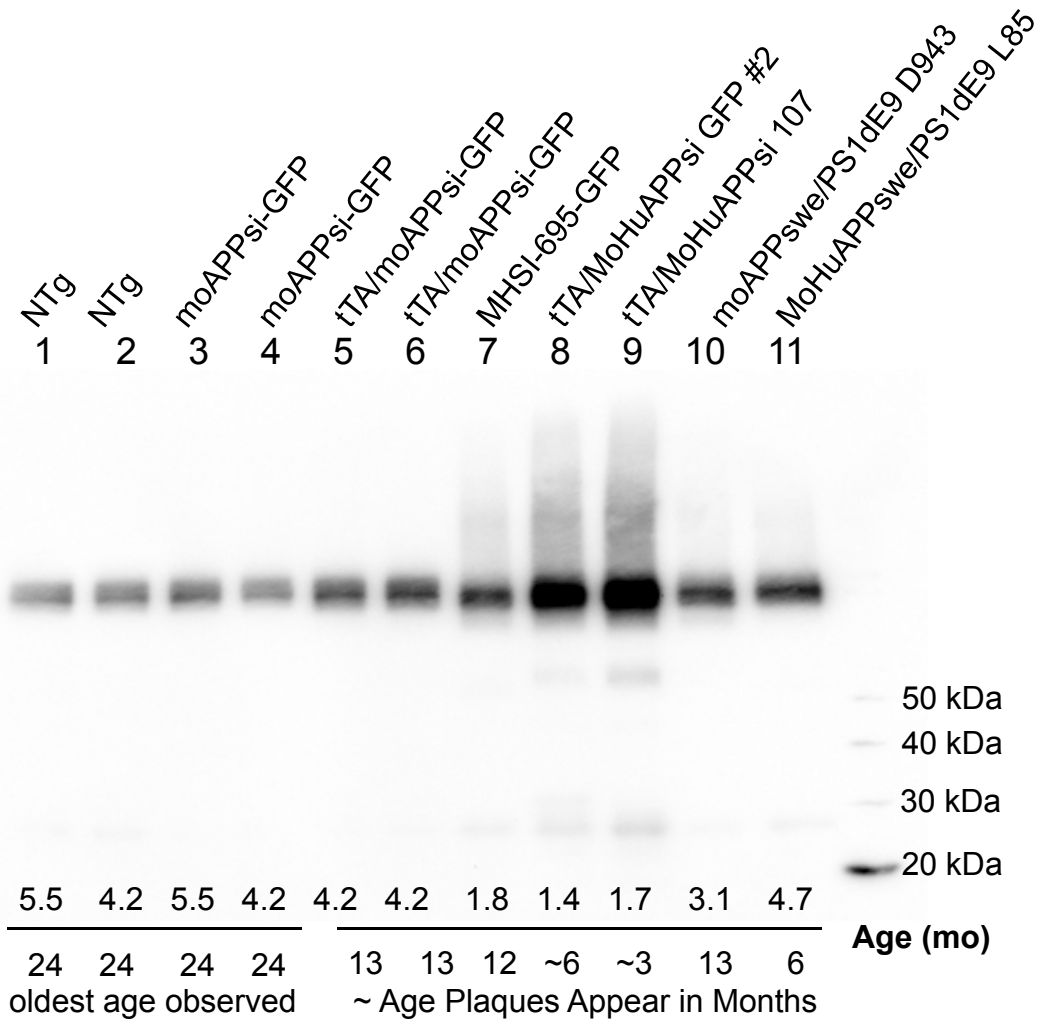

Fig. S2. Distribution of amyloid deposition in PrP.MoA $\beta$ /PS1 and PrP.HuA $\beta$ /PS1 mice.

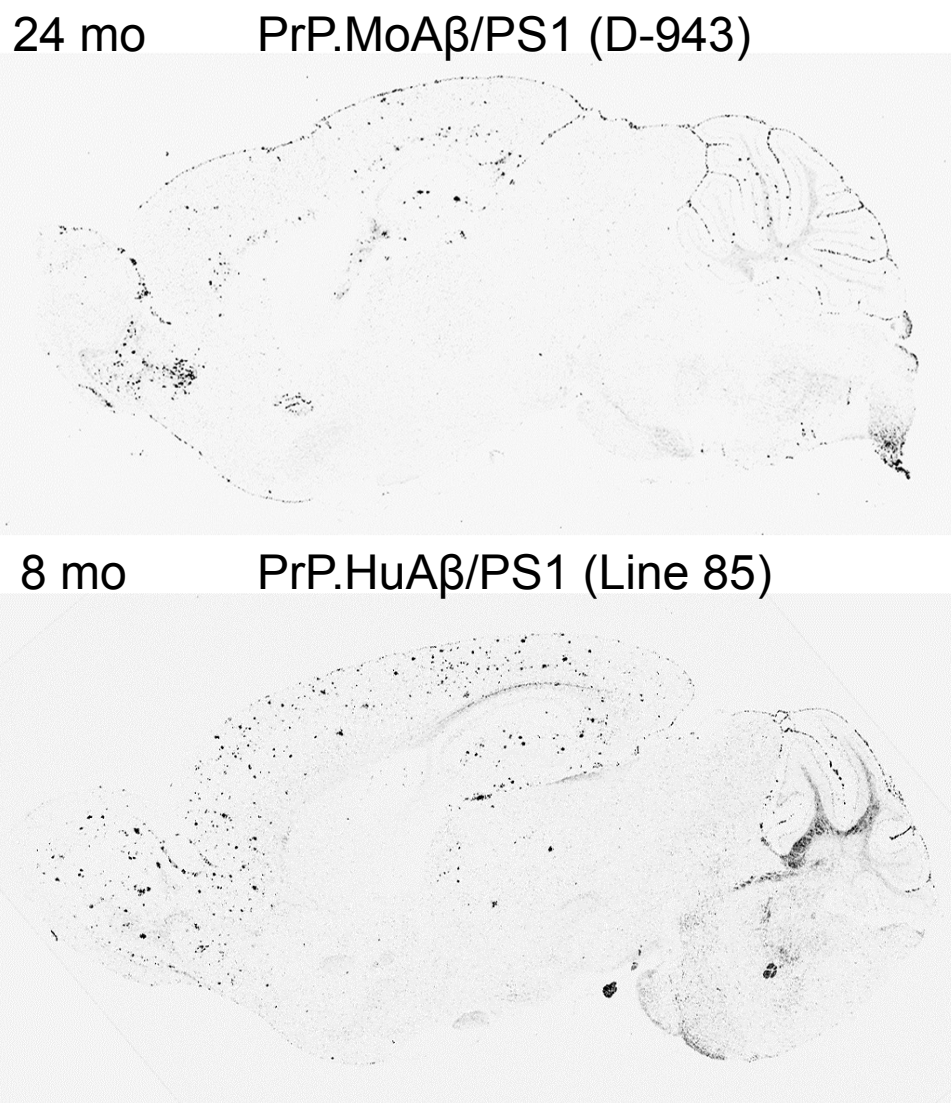

Fig. S3. The distribution of amyloid plaques in PrP.MoA $\beta$ /PS1 and PrP.HuA $\beta$ /PS1 mice.

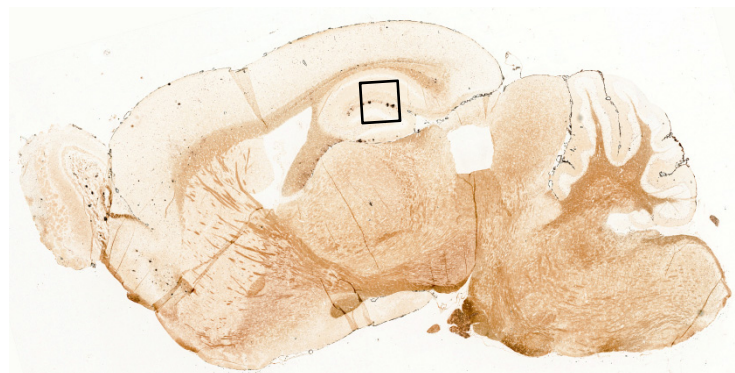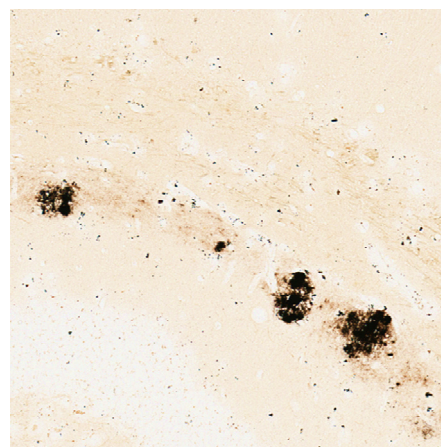

PrP.MoA $\beta$ /PS1 (Line D-943) - 24 months old

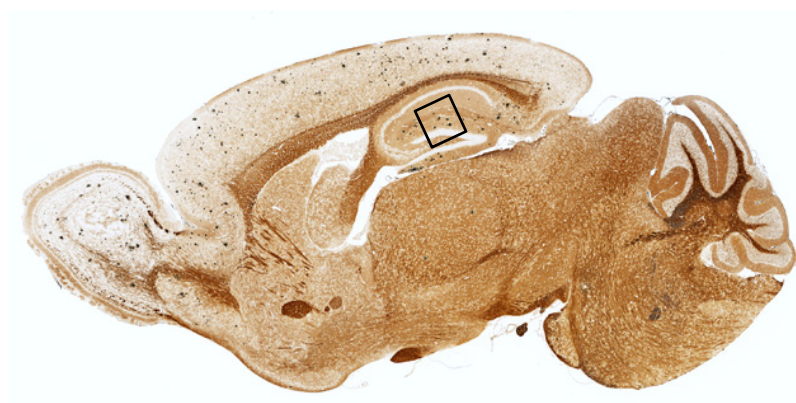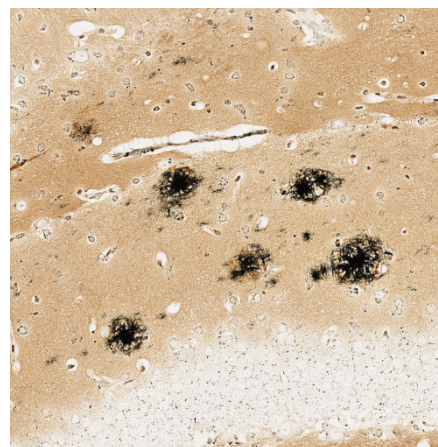

PrP.HuA $\beta$ /PS1 (Line 85)- 8 months old

10 mm



Fig. S4. Congo Red staining of cored amyloid deposits.

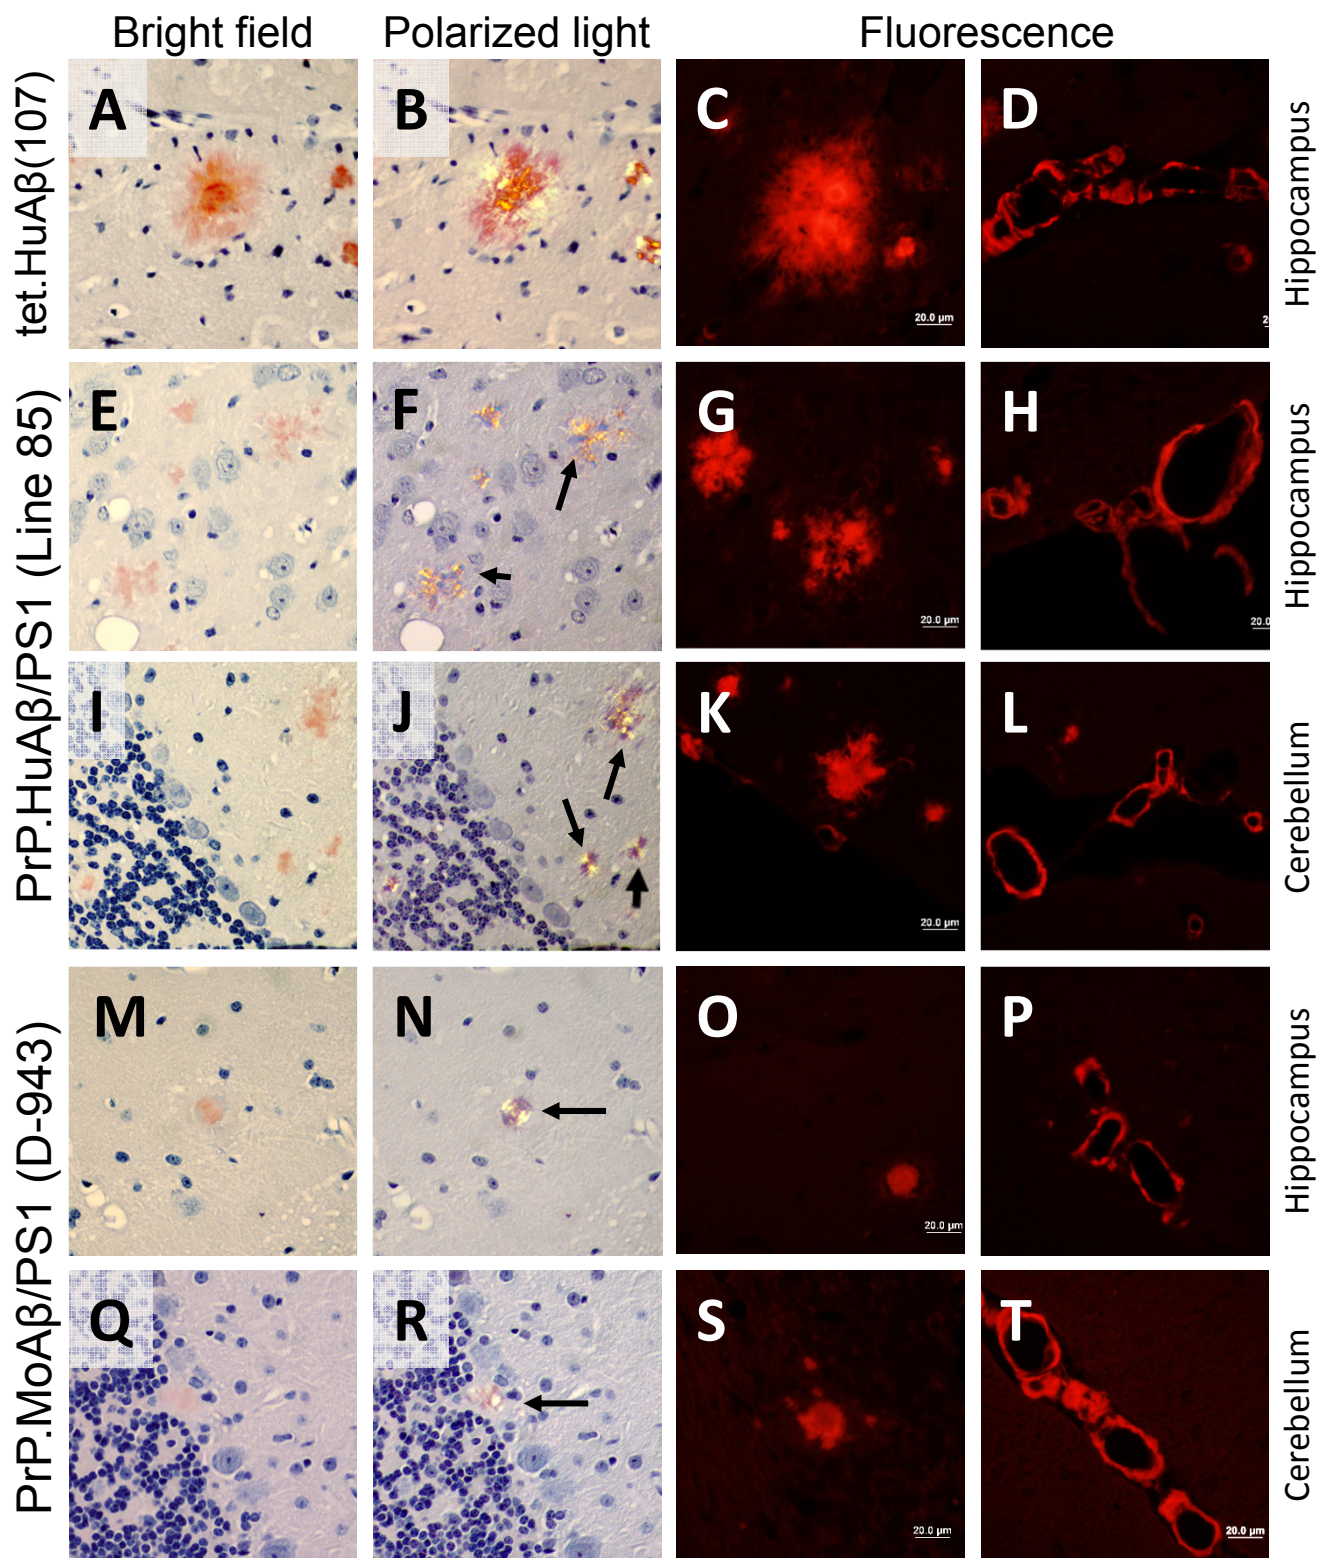



Fig. S5. The distribution of amyloid plaques in tet.MoA $\beta$ (GFP), tet.HuA $\beta$ (107), and tet.HuA $\beta$ (GFP) mice.

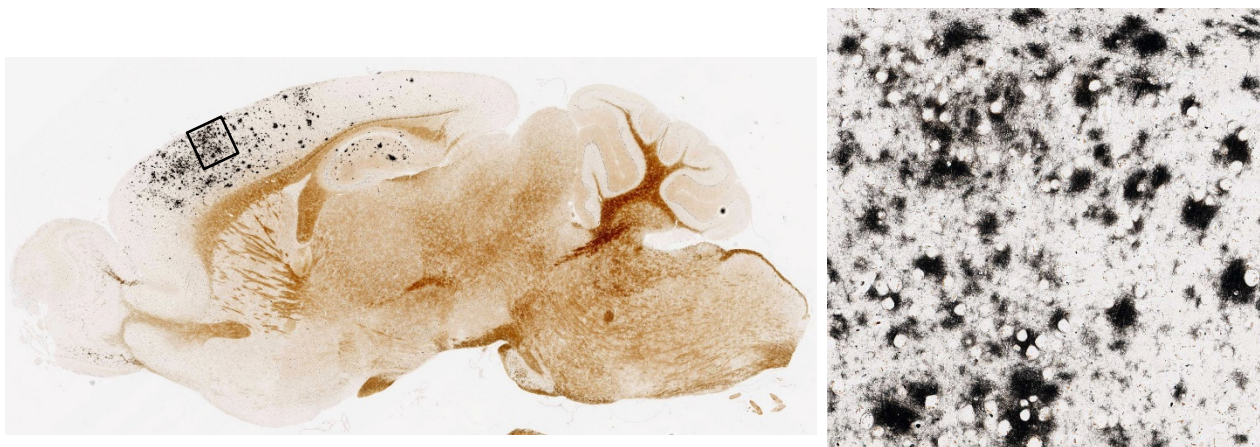

tet.MoA $\beta$ (GFP)- 18 months old

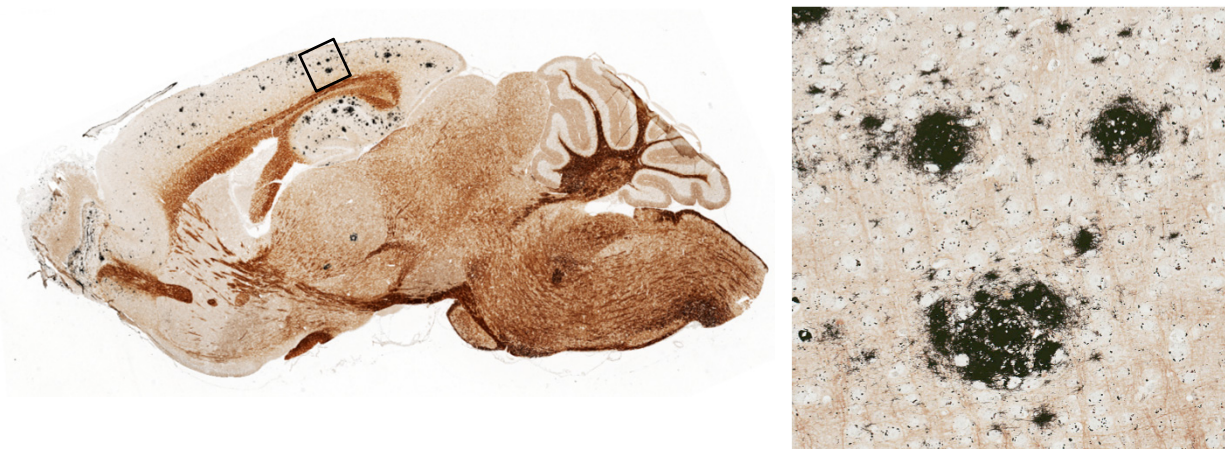

tet.HuA $\beta$ (107) 9 months old

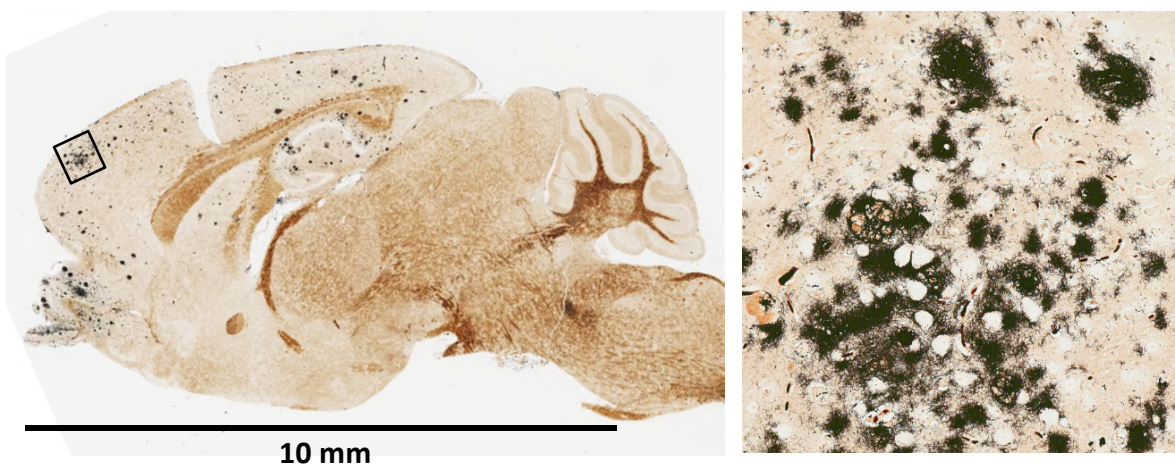

tet.HuA $\beta$ (GFP) - 7 months old



Fig. S6 . The distribution of amyloid plaques in very old tetMoA $\beta$ (GFP) mice.

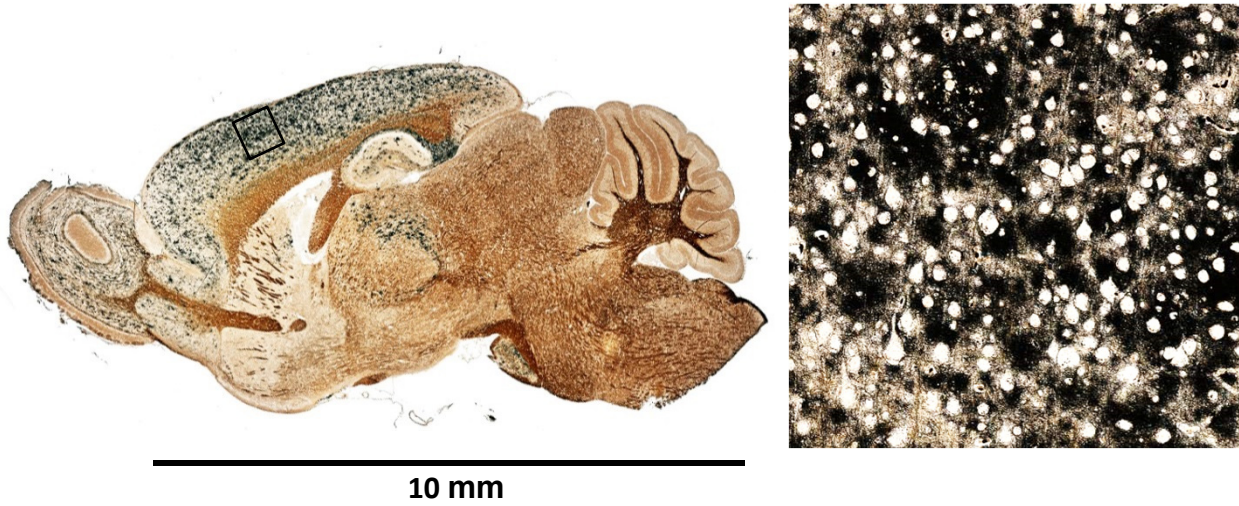

tet.MoA $\beta$ (GFP) - 24 months old

Fig. S7. The distribution of amyloid plaques in PrP.HuA $\beta$ (GFP) mice.

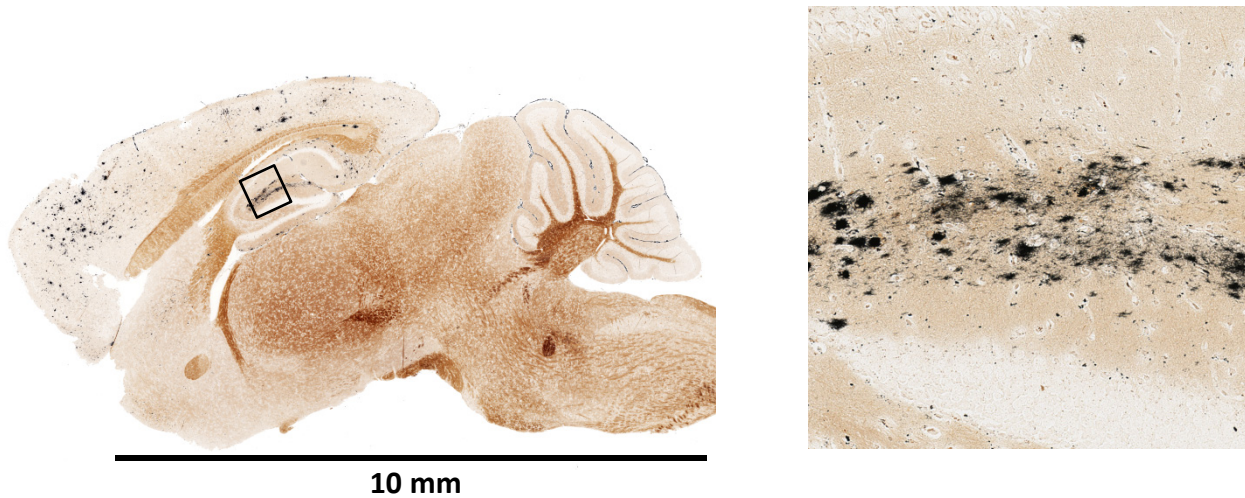

10 mm

PrP.HuA $\beta$ (GFP) - 20 months old

Fig. S8A. Comparisons of the levels of A $\beta$  in SDS- and FA-soluble fractions analyzed by ELISA between transgenic mice expression mouse or human A $\beta$ .

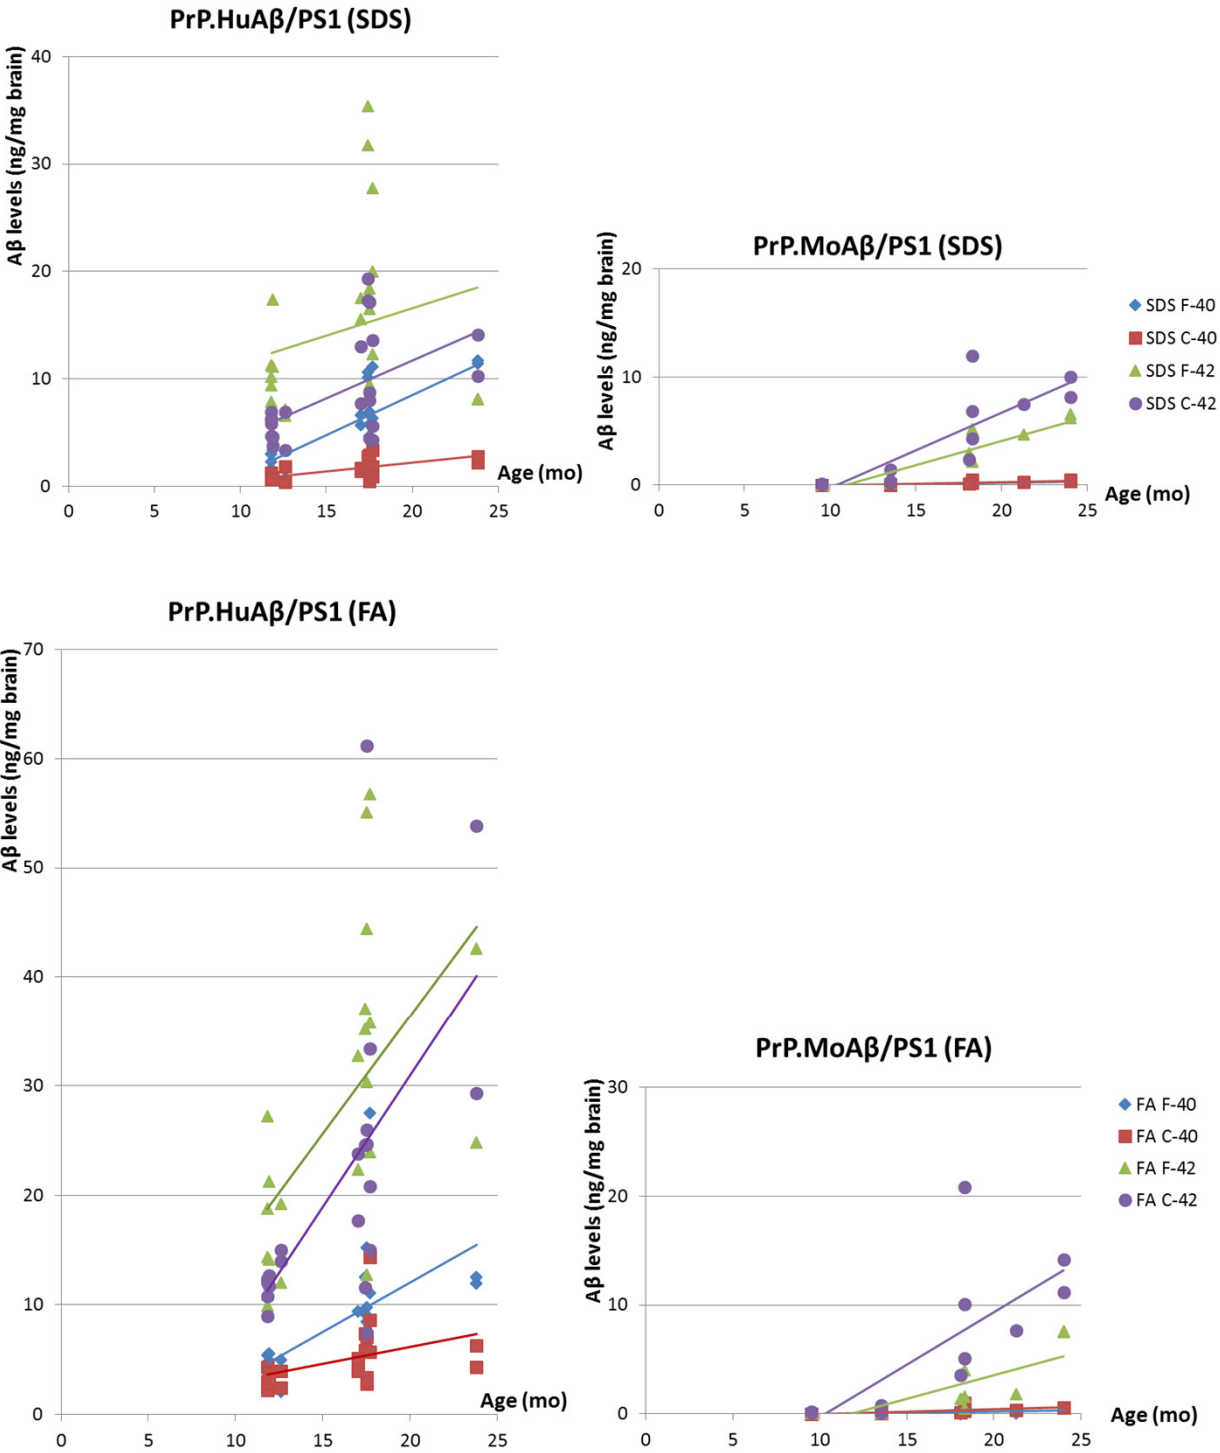



Fig. S8B. Comparison of the ratios of A $\beta$  42/40 in SDS- and FA-soluble fractions analyzed by ELISA between transgenic mice expression mouse or human A $\beta$ .

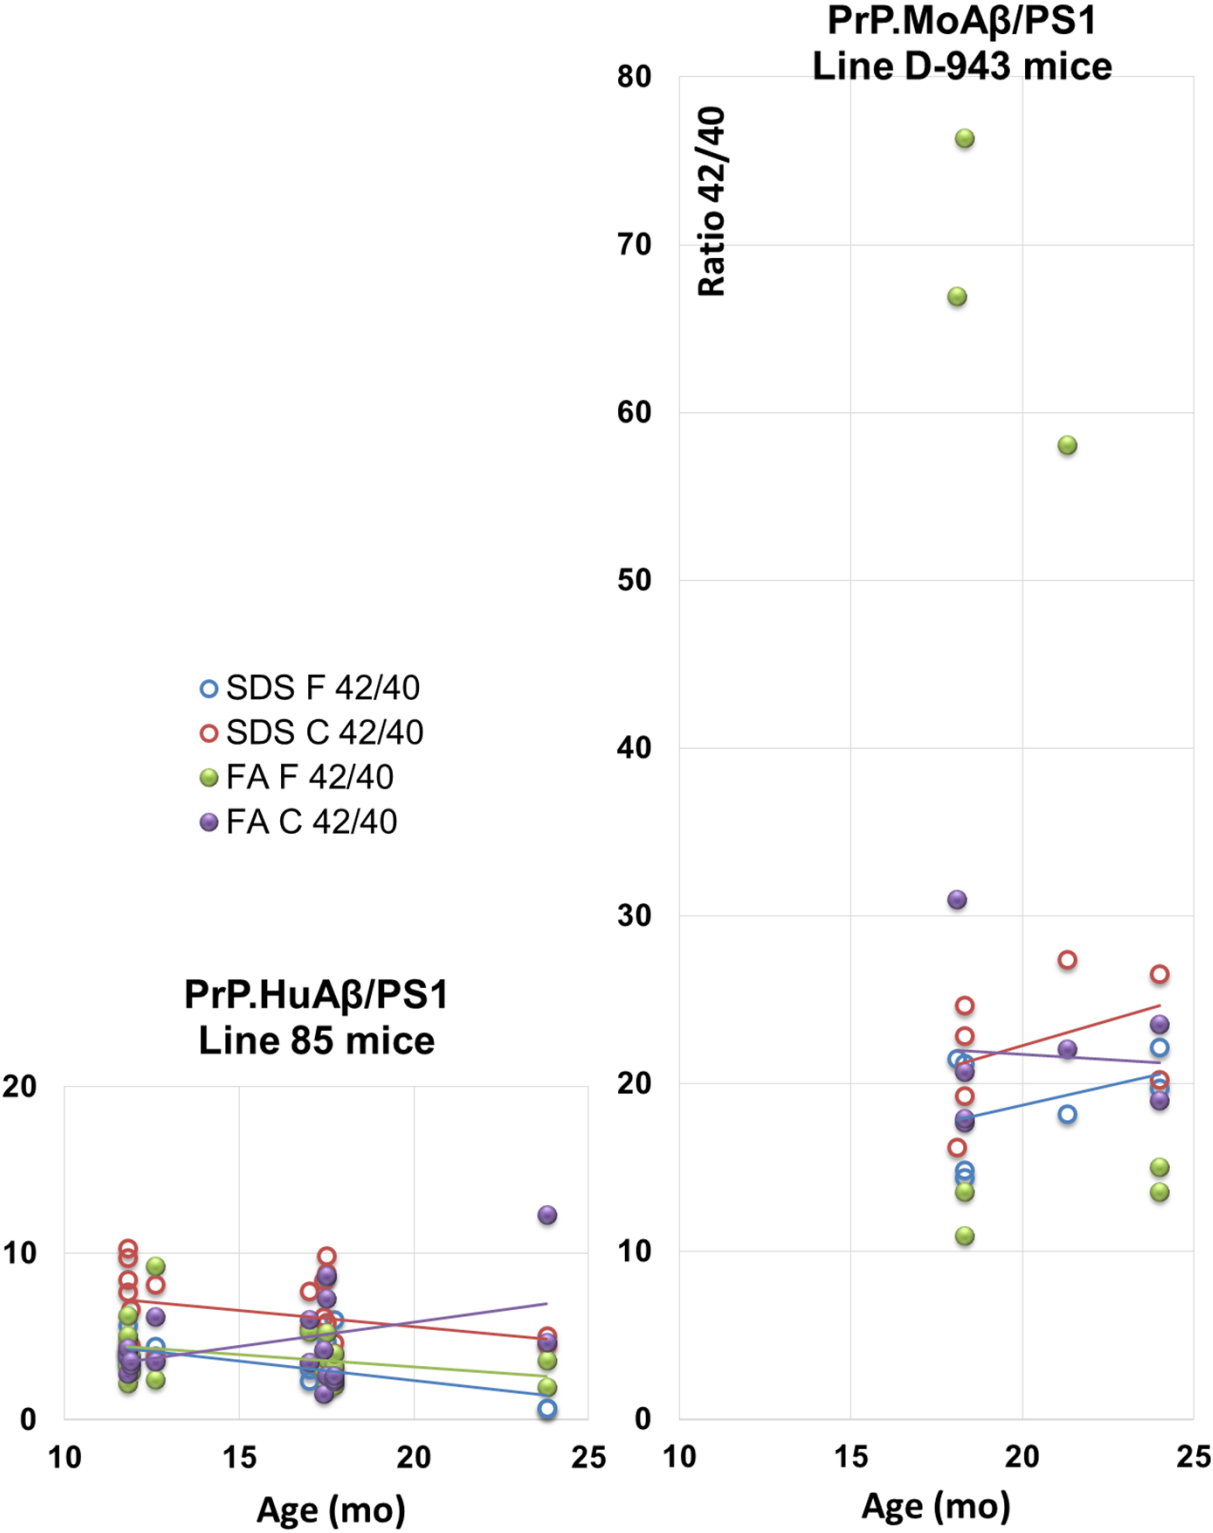

Fig. S9. Analysis of SDS- and FA- soluble fractions of mouse A $\beta$  by ELISA in tet.MoA $\beta$ (GFP) mice.

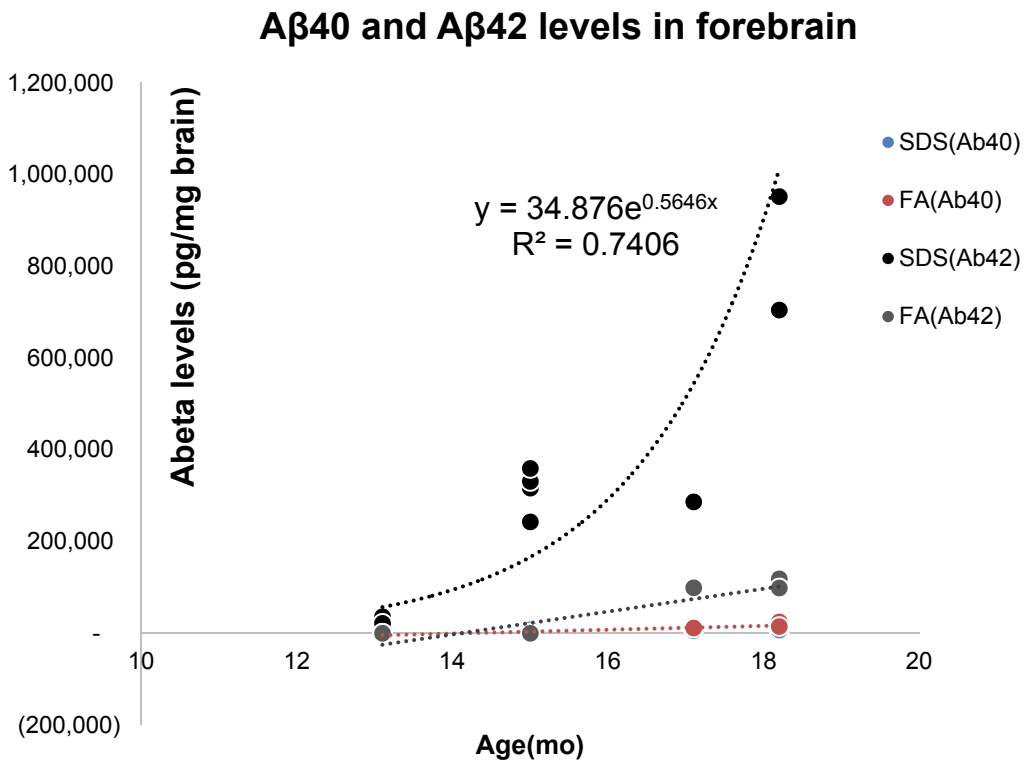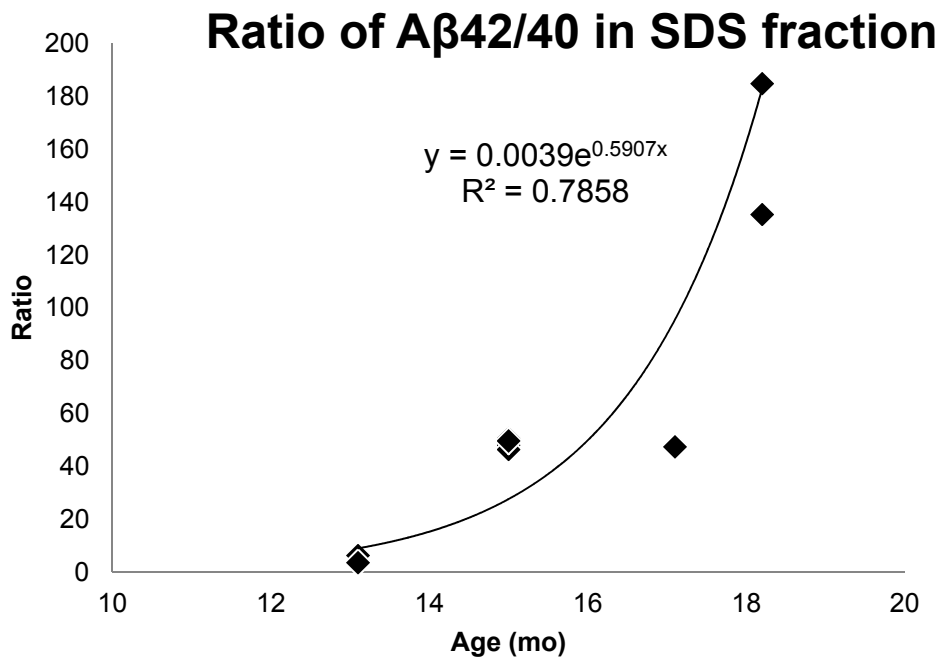

Fig. S10. Neuritic morphology of amyloid plaques in the cerebellum of PrP.HuA $\beta$ /PS1 (Line 85) and PrP.MoA $\beta$ /PS1 (D-943) mice.

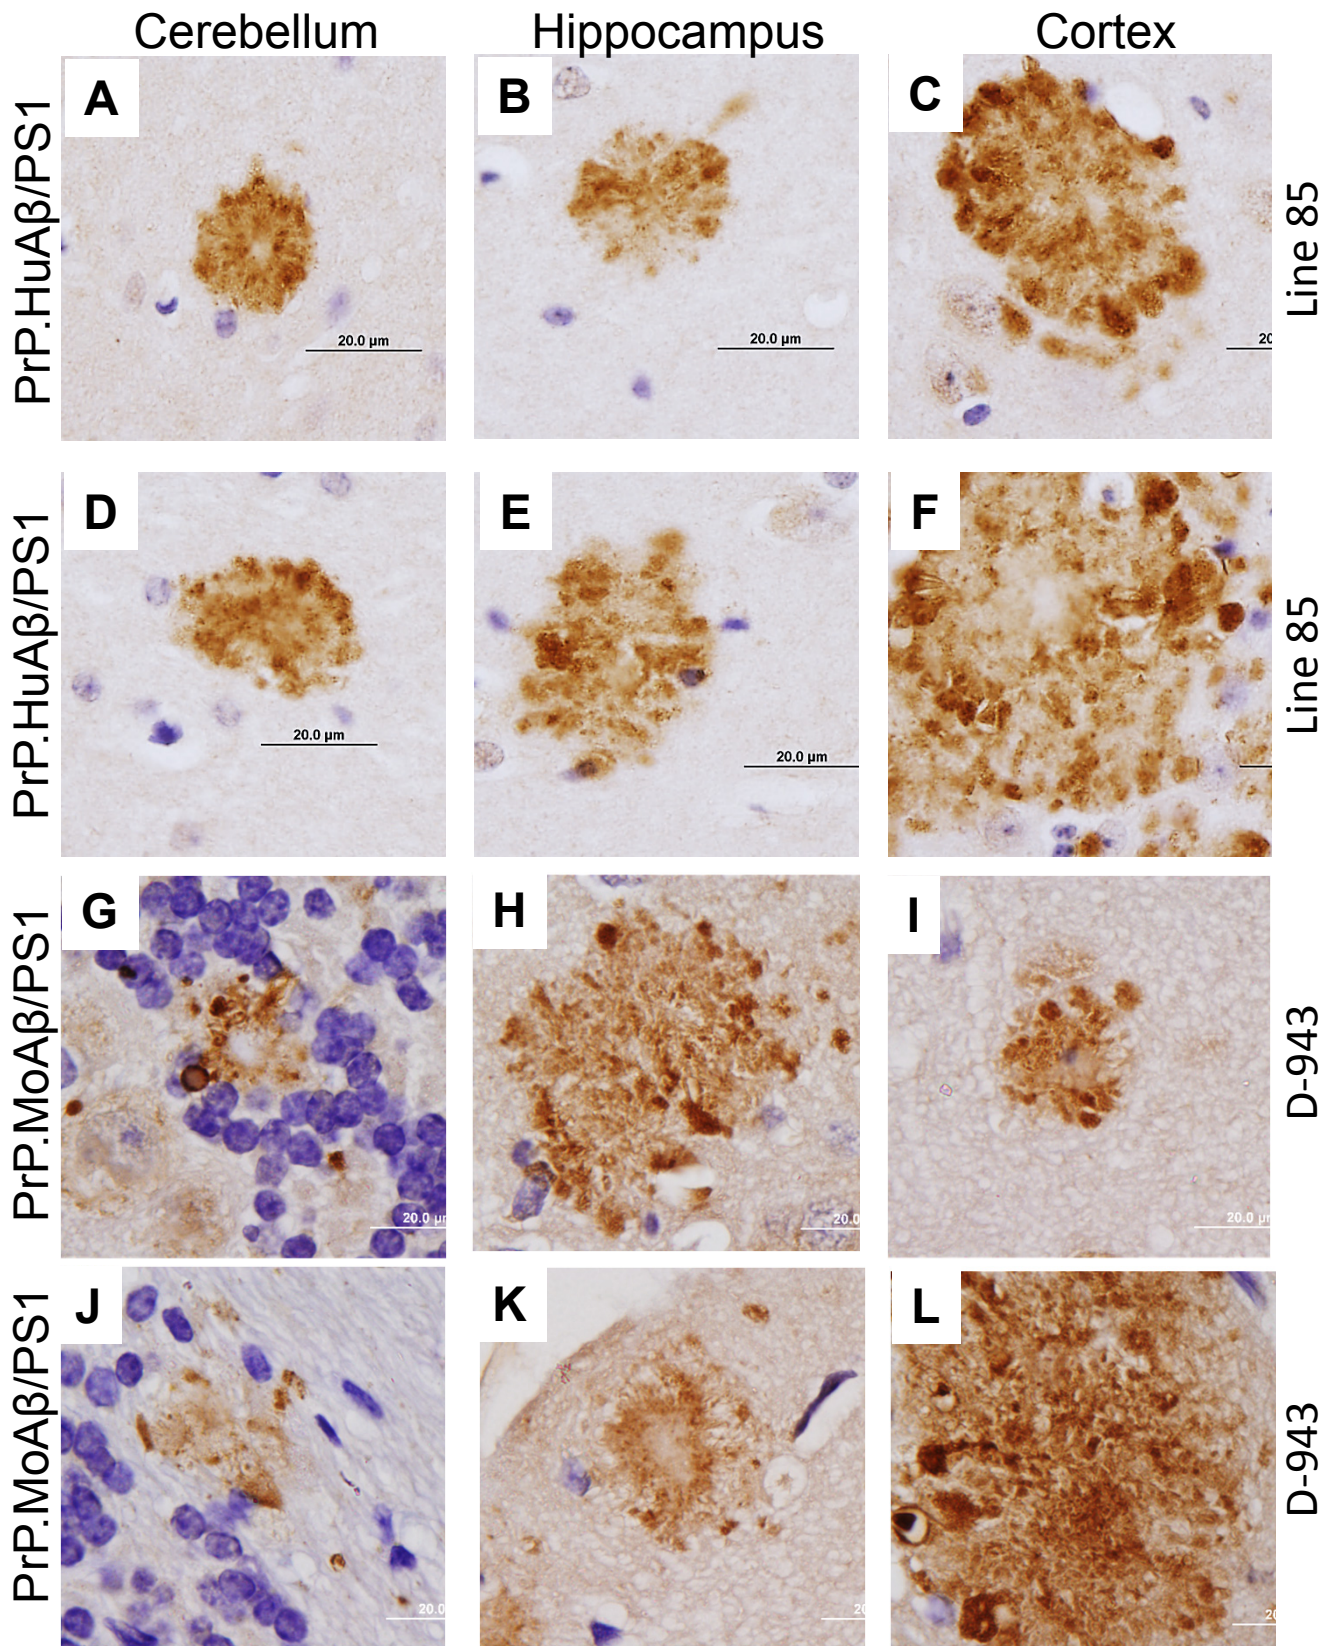

Supplement: MOESM1 [file 25665818]
